# Supplementary material for: Nursing Interventions to Prevent Delirium in Critically Ill Patients in the Intensive Care Unit during the COVID19 Pandemic—Narrative Overview
Source: MDPI journal article supplement (doi:10.3390/healthcare8040578), 2020-12-21
Supplement: s1 [file s1]

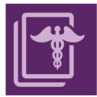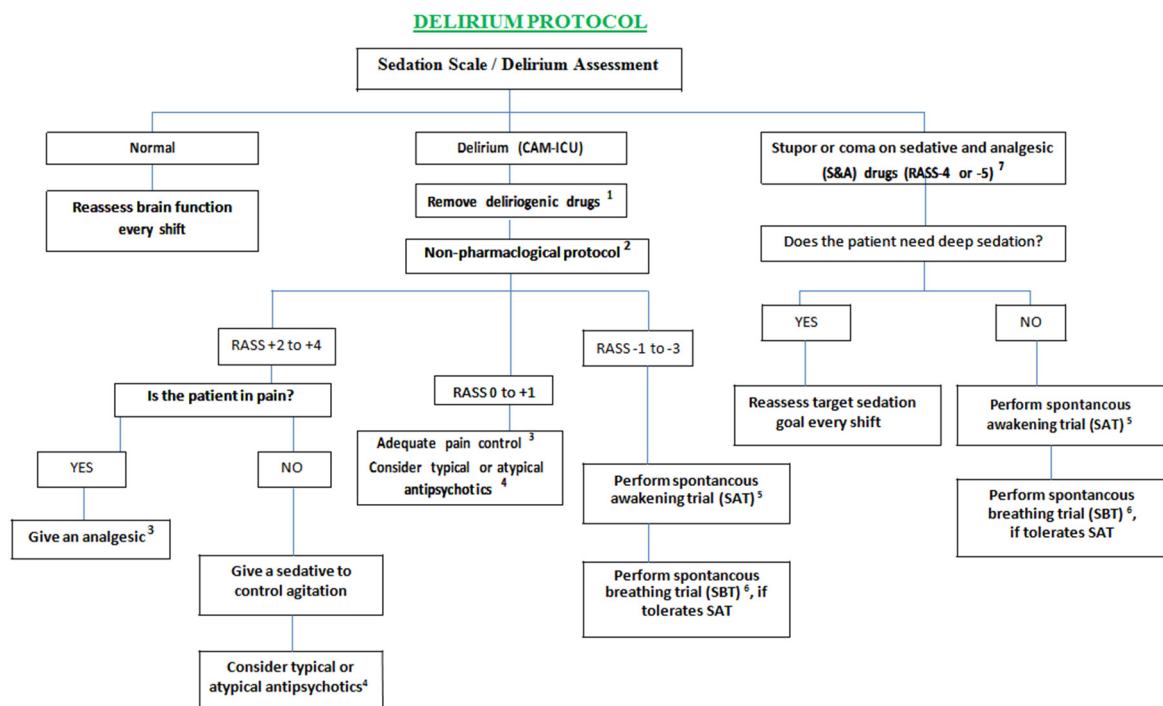

Figure 1. Delirium protocol – workflow.

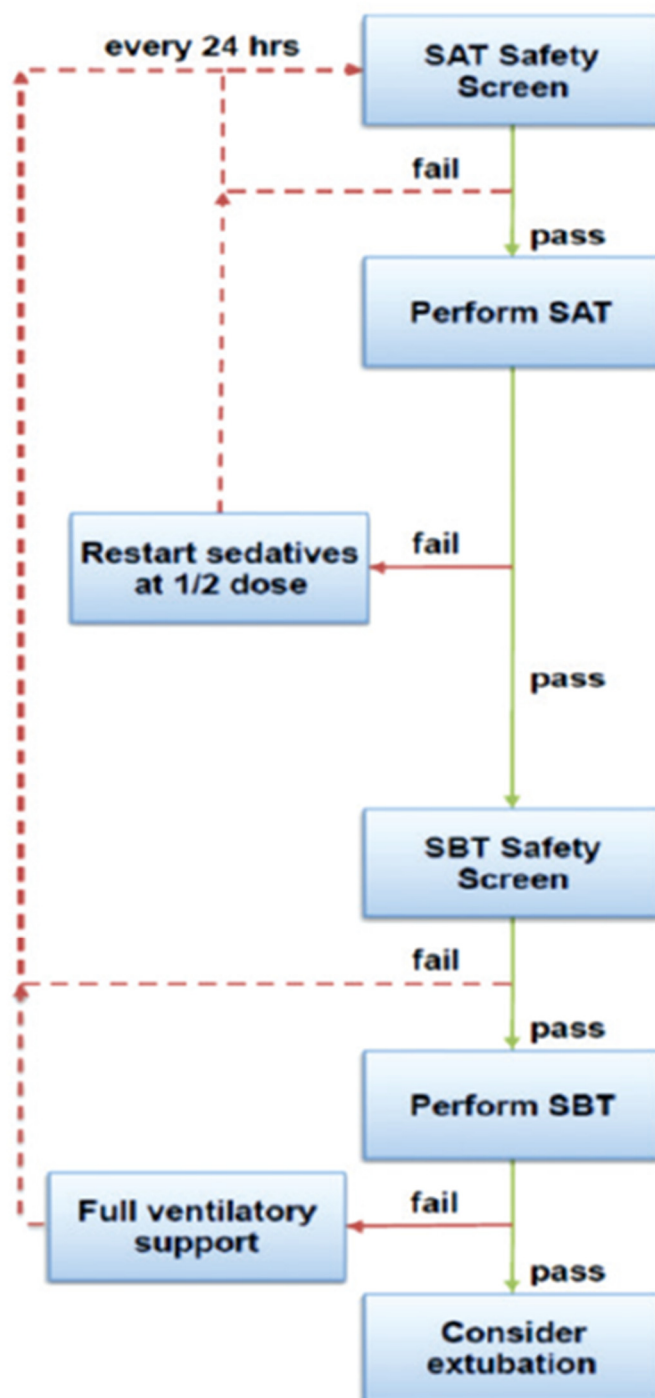

**Figure 2.** Diagram of the procedure in the 'Wake Up and Breathe' Protocol.
